# Supplementary material for: Col4a3-/- Mice on Balb/C Background Have Less Severe Cardiorespiratory Phenotype and SGLT2 Over-Expression Compared to 129x1/SvJ and C57Bl/6 Backgrounds
Source: MDPI journal article supplement (doi:10.3390/ijms23126674), 2022-06-15
Supplement: s1 [file s1]

**Table S1.** Echocardiography parameters of Pulse-wave doppler (PWD) of pulmonary valve, ascending aorta and diaphragm ultrasonography in male mice from 129J, Balb/C and C57Bl/6 background

| Echocardiography<br>parameters       | 129J                           |                                | Balb/C                       |                             | C57Bl/6          |                              |
|--------------------------------------|--------------------------------|--------------------------------|------------------------------|-----------------------------|------------------|------------------------------|
|                                      | 8 weeks old                    |                                | 8 weeks old                  |                             | 20 weeks old     |                              |
| Pulmonary valve                      |                                |                                |                              |                             |                  |                              |
|                                      | WT (n=13)                      | Col4a3 <sup>-/-</sup> (n=14)   | WT (n=12)                    | Col4a3 <sup>-/-</sup> (n=9) | WT (n=11)        | Col4a3 <sup>-/-</sup> (n=9)  |
| PAT (ms)                             | 20.53 ± 3.63                   | 18.99 ± 4.6                    | 18.73 ± 2.74                 | 18.55 ± 3.38                | 18.59 ± 3.58     | 19.78 ± 3.29                 |
| PET (ms)                             | 61. 50 ± 2.83                  | 56.35 ± 9.10                   | 62.48 ± 8.11                 | 60.77 ± 4.11                | 53.51 ± 4.13     | 55.80 ± 2.80                 |
| PV Peak Vel (mm/s)                   | -689±118.23 <sup>€€</sup>      | -609.59±105.58                 | -529.85 ± 87.80 <sup>†</sup> | -576.33 ± 90.07             | -689.88 ± 162.09 | -669.29 ± 83.74              |
| PV VTI (mm)                          | 30.1 ± 5.06                    | 23.39 ± 7.82*                  | 23.57 ± 4.29                 | 25.65 ± 3.91                | 26.91 ± 5.54     | 26.06 ± 3.33                 |
| Mean Vel (PV VTI,<br>mm/s)           | -415.8 ± 68.5                  | -358.4 ± 63.65                 | -334.4 ± 57.15               | -365.5 ± 61.37              | -436.8 ± 103.3   | -395.7 ± 73.6                |
| Mean Grad (PV VTI,<br>mmHg)          | 0.71 ± 0.23                    | 0.53 ± 0.19                    | 0.46 ± 0.15                  | 0.55 ± 0.20                 | 0.80 ± 0.36      | 0.65 ± 0.23                  |
| Peak Vel (PV VTI,<br>mm/s)           | -705.1 ± 120.4                 | -609.4 ± 107                   | -539.9 ± 91.52 <sup>€†</sup> | -588.1 ± 98.58              | -697.2 ± 161.9   | -685.6 ± 72.03               |
| Peak Grad (PV VTI,<br>mmHg)          | 2.04 ± 0.67                    | 1.53 ± 0.54                    | 1.20 ± 0.38 <sup>€†</sup>    | 1.42 ± 0.49                 | 2.04 ± 0.89      | 1.9 ± 0.39                   |
| MPAP (common,<br>mmHg)               | 69.6 ± 1.70                    | 70.46 ± 2.06                   | 70.57 ± 1.24                 | 70.65 ± 1.52                | 70.64 ± 1.61     | 70.1 ± 1.48                  |
| MPAP (PAT < 120<br>ms, mmHg)         | 76.97 ± 2.24                   | 78.23 ± 2.83                   | 78.39 ± 1.70                 | 78.5 ± 2.1                  | 78.48 ± 2.22     | 77.73 ± 2.04                 |
| PAT/PET                              | 0.33 ± 0.057                   | 0.33 ± 0.047                   | 0.30 ± 0.04                  | 0.31 ±0.05                  | 0.34 ± 0.05      | 0.35 ± 0.05                  |
| PV Peak Pressure<br>(mmHg)           | 1.96 ± 0.66                    | 1.53 ± 0.53                    | 1.15 ± 0.36 <sup>€†</sup>    | 1.36 ± 0.44                 | 1.99 ± 0.88      | 1.82 ± 0.45                  |
| Ascending Aorta                      |                                |                                |                              |                             |                  |                              |
|                                      | WT (n=13)                      | Col4a3 <sup>-/-</sup> (n=15)   | WT (n=12)                    | Col4a3 <sup>-/-</sup> (n=9) | WT (n=11)        | Col4a3 <sup>-/-</sup> (n=10) |
| AET (ms)                             | 50.31 ± 3.12                   | 45.67 ± 5.0 <sup>€€, ¥¥</sup>  | 56.32 ± 6.27                 | 56.67 ± 7.33                | 51.50 ± 6.39     | 55.03 ± 9.15                 |
| Aortic valve Peak<br>Velocity (mm/s) | 817.38 ± 226.07 <sup>€€€</sup> | 893.92±127.13 <sup>€€€</sup>   | 522.97±127.20                | 555.87±139.26               | 613.28±176.67    | 661.54±199.93 <sup>¥¥</sup>  |
| AV Peak Pressure<br>(mmHg)           | 2.86 ± 1.45 <sup>€€€, ¥¥</sup> | 3.26 ± 0.91 <sup>€€€, ¥¥</sup> | 1.15 ±0.48                   | 1.31 ± 0.69                 | 1.62 ± 0.85      | 1.89 ± 1.14                  |
| Diaphragm ultrasonography            |                                |                                |                              |                             |                  |                              |
|                                      | WT (n=13)                      | Col4a3 <sup>-/-</sup> (n=15)   | WT (n=12)                    | Col4a3 <sup>-/-</sup> (n=9) | WT (n=11)        | Col4a3 <sup>-/-</sup> (n=10) |
| Diaphragm<br>movement (in mm)        | 0.83 ± 0.10                    | 0.58 ± 0.065                   | 0.95 ± 0.12                  | 0.89 ± 0.16                 | 1.07 ± 0.27      | 0.9 ± 0.36                   |

PAT: Pulmonary Acceleration Time, PET: Pulmonary Ejection Time, PV: Pulmonary Valve, VTI: Velocity Time Integral, Vel: Velocity, Grad: Gradient, MPAP: Mean Pulmonary Artery Pressure, AET: Aortic Ejection Time, AV: Aortic Valve, ms: milliseconds, s: seconds, mm: millimeters. Values are mean ± SD. \*p<0.05, \*\*p<0.01, \*\*\*p<0.001 and \*\*\*\*p<0.0001 compared Col4a3<sup>-/-</sup> with their respective control (same strain), †p<0.05, ††p<0.01, †††p<0.001, ††††p<0.0001 differences between Balb/C strain and C57Bl/6 strain (WT vs WT and Col4a3<sup>-/-</sup> vs Col4a3<sup>-/-</sup>), €p<0.05, €€p<0.01, €€€p<0.001, €€€€p<0.0001 differences between Balb/C strain and 129J (WT vs WT and Col4a3<sup>-/-</sup> vs Col4a3<sup>-/-</sup>), ¥P<0.05, ¥¥p<0.01, ¥¥¥p<0.001, ¥¥¥¥p<0.0001 difference between 129J and C57Bl/6 (WT Vs WT and Col4a3<sup>-/-</sup> vs Col4a3<sup>-/-</sup>).

**Table S2.** Echocardiography parameters of Pulse-wave doppler (PWD) of pulmonary valve, ascending aorta and diaphragm ultrasonography in female mice from 129J, Balb/C and C57Bl/6 background

| Echocardiography<br>parameters       | 129J                          |                              | Balb/C         |                              | C57Bl/6                         |                               |
|--------------------------------------|-------------------------------|------------------------------|----------------|------------------------------|---------------------------------|-------------------------------|
|                                      | 8 weeks old                   |                              | 8 weeks old    |                              | 20 weeks old                    |                               |
|                                      | Pulmonary valve               |                              |                |                              |                                 |                               |
|                                      | WT (n=13)                     | Col4a3 <sup>-/-</sup> (n=16) | WT (n=12)      | Col4a3 <sup>-/-</sup> (n=14) | WT (n=14)                       | Col4a3 <sup>-/-</sup> (n=10)  |
| PAT(ms)                              | 18.23 ± 2.31                  | 20.69 ± 3.40                 | 18.43 ± 4.28   | 18.06 ± 3.85                 | 19.50 ± 2.5                     | 20.36 ± 3.78                  |
| PET(ms)                              | 58.99 ± 4.93                  | 59.64 ± 6.72                 | 59.73 ± 4.65   | 65.57 ± 7.28 <sup>†††</sup>  | 54.82 ± 3.13                    | 54.44 ± 2.82                  |
| PV Peak Vel (mm/s)                   | -792.67±166.13 <sup>€€</sup>  | -723.34±156.9 <sup>€€</sup>  | -591.48±134.04 | -536.61±125.96               | -651.96 ± 90.22                 | -662.36 ±130.35               |
| PV VTI (mm)                          | 31.13 ± 6.44                  | 28.98 ± 5.31                 | 26.38 ± 5.25   | 24.79 ± 5.89                 | 25.32 ± 3.81                    | 24.14 ± 4.67                  |
| Mean Vel (PV VTI,<br>mm/s)           | -468.7 ± 96.99                | -430.4 ± 88.2 <sup>€</sup>   | -377.4 ± 81.09 | -332.4 ± 70.65               | -404.5 ± 62.05                  | -410.8 ± 69.39                |
| Mean Grad (PV VTI,<br>mmHg)          | 0.91 ± 0.37 <sup>€</sup>      | 0.77 ± 0.32 <sup>€</sup>     | 0.59 ± 0.24    | 0.46 ± 0.18                  | 0.67 ± 0.2                      | 0.69 ± 0.22                   |
| Peak Vel (PV VTI,<br>mm/s)           | -797.3 ± 170.5 <sup>€</sup>   | -727.3 ± 157.9 <sup>€€</sup> | -609 ± 118.8   | -544.6 ± 122.3               | -666.2 ± 97.74                  | -672.3 ± 130                  |
| Peak Grad (PV VTI,<br>mmHg)          | 2.65 ± 1.11 <sup>€€</sup>     | 2.21 ± 0.96 <sup>€</sup>     | 1.53 ± 0.56    | 1.24 ± 0.51                  | 1.81 ± 0.50                     | 1.87 ± 0.69                   |
| MPAP (common,<br>mmHg)               | 70.8 ± 1.04                   | 69.69 ± 1.53                 | 70.71 ± 1.92   | 70.88 ± 1.73                 | 70.22 ± 1.12                    | 69.84 ± 1.70                  |
| MPAP (PAT < 120<br>ms, mmHg)         | 78.7 ± 1.43                   | 77.17 ± 2.11                 | 78.58 ± 2.65   | 78.81 ± 2.39                 | 77.91 ± 1.55                    | 77.38 ± 2.34                  |
| PAT/PET                              | 0.31 ± 0.035                  | 0.35 ± 0.04 <sup>€€</sup>    | 0.31 ± 0.07    | 0.28 ± 0.06 <sup>†††</sup>   | 0.36 ± 0.036                    | 0.375 ± 0.071                 |
| PV Peak Pressure<br>(mmHg)           | 2.62 ± 1.07 <sup>€€, ¥</sup>  | 2.18 ± 0.95 <sup>€€</sup>    | 1.47 ± 0.6     | 1.21 ± 0.52                  | 1.73 ± 0.45                     | 1.82 ± 0.68                   |
| Ascending Aorta                      |                               |                              |                |                              |                                 |                               |
|                                      | WT (n=13)                     | Col4a3 <sup>-/-</sup> (n=16) | WT (n=12)      | Col4a3 <sup>-/-</sup> (n=14) | WT (n=14)                       | Col4a3 <sup>-/-</sup> (n=10)  |
| AET (ms)                             | 51.37 ± 3.08 <sup>€</sup>     | 49.59 ± 2.44 <sup>€€</sup>   | 57.63 ± 4.82   | 55.98 ± 4.51                 | 52.72 ± 3.09                    | 52.76 ± 8.04                  |
| Aortic valve Peak<br>Velocity (mm/s) | 10009 ± 216.11 <sup>€€€</sup> | 959.1 ± 156.6 <sup>€€€</sup> | 504.36 ± 159.3 | 452.14 ± 138.79              | 620.24 ±<br>134.54 <sup>¥</sup> | 557.13 ± 136.99 <sup>¥¥</sup> |
| AV Peak Pressure<br>(mmHg)           | 4.01± 1.59 <sup>€€€€</sup>    | 3.77 ± 1.21 <sup>€€€€</sup>  | 1.11 ± 0.79    | 0.76 ± 0.31                  | 1.61 ± 0.69 <sup>¥¥¥</sup>      | 1.16 ± 0.41 <sup>¥¥¥</sup>    |
| Diaphragm ultrasonography            |                               |                              |                |                              |                                 |                               |
|                                      | WT (n=13)                     | Col4a3 <sup>-/-</sup> (n=15) | WT (n=12)      | Col4a3 <sup>-/-</sup> (n=9)  | WT (n=11)                       | Col4a3 <sup>-/-</sup> (n=10)  |
| Diaphragm<br>movement (in mm)        | 0.86 ± 0.17                   | 0.75 ± 0.28                  | 0.95 ± 0.25    | 0.86 ± 0.26                  | 0.98 ± 0.26                     | 0.79 ± 0.2                    |

PAT: Pulmonary Acceleration Time, PET: Pulmonary Ejection Time, PV: Pulmonary Valve, VTI: Velocity Time Integral, Vel: Velocity, Grad: Gradient, MPAP: Mean Pulmonary Artery Pressure, AET: Aortic Ejection Time, AV: Aortic Valve, ms: milliseconds, s: seconds, mm: millimeters. Values are mean ± SD. \*p<0.05, \*\*p<0.01, \*\*\*p<0.001 and \*\*\*\*p<0.0001 compared Col4a3<sup>-/-</sup> with their respective control (same strain), †p<0.05, ††p<0.01, †††p<0.001, ††††p<0.0001 differences between Balb/C strain and C57Bl/6 strain (WT vs WT and Col4a3<sup>-/-</sup> vs Col4a3<sup>-/-</sup>), €p<0.05, €€p<0.01, €€€p<0.001, €€€€p<0.0001 differences between Balb/C strain and 129J (WT vs WT and Col4a3<sup>-/-</sup> vs Col4a3<sup>-/-</sup>), ¥P<0.05, ¥¥p<0.01, ¥¥¥p<0.001, ¥¥¥¥p<0.0001 difference between 129J and C57Bl/6 (WT Vs WT and Col4a3<sup>-/-</sup> vs Col4a3<sup>-/-</sup>).

**Table S3.** Heart and lung gravimetric data for male and females mice from 129J, Balb/C and C57Bl/6 background

| Gravimetric parameters | 129J                            |                                        | Balb/C          |                                        | C57Bl/6         |                                       |
|------------------------|---------------------------------|----------------------------------------|-----------------|----------------------------------------|-----------------|---------------------------------------|
|                        | 8 weeks old                     |                                        | 8 weeks old     |                                        | 20 weeks old    |                                       |
| Male                   |                                 |                                        |                 |                                        |                 |                                       |
|                        | WT (n=17)                       | <i>Col4a3</i> <sup>-/-</sup> (n=18)    | WT (n=13)       | <i>Col4a3</i> <sup>-/-</sup> (n=5)     | WT (n=13-15)    | <i>Col4a3</i> <sup>-/-</sup> (n=9-10) |
| BW (g)                 | 21.81 ± 2.09                    | 17.62 ± 2.36****                       | 23.25 ± 3.22+++ | 19.89 ± 0.66*,+++                      | 27.56 ± 2.32*** | 26.11 ± 1.93***                       |
| HW (mg)                | 115.7 ± 16.64                   | 115.6 ± 18.8                           | 124.1 ± 20.7    | 117.9 ± 21.77                          | 116.8 ± 16.57   | 128.1 ± 16.18                         |
| Tibia length (cm)      | 1.73 ± 0.08                     | 1.73 ± 0.07                            | 1.71 ± 0.07     | 1.64 ± 0.05++                          | 1.75 ± 0.06     | 1.78 ± 0.04                           |
| HW/BW (mg/g)           | 5.31 ± 0.59                     | 6.6 ± 0.87***                          | 5.3 ± 0.49      | 6.2 ± 1.04                             | 5.50 ± 0.52     | 5.41 ± 0.68**                         |
| HW/TL(mg/cm)           | 66.85 ± 8.86**                  | 66.74 ± 11.03                          | 72.44 ± 9.67+   | 71.89 ± 11.70                          | 85.87 ± 14.29   | 79.25 ± 9.67                          |
| LW(Wet) (mg)           | 127.1 ± 15.88**                 | 131.6 ± 25.5*                          | 149.9 ± 17.67   | 160 ± 43.98                            | 170.3 ± 27.12   | 178.3 ± 37.76                         |
| LW/BW (mg/g)           | 6.11 ± 1.04                     | 7.47 ± 0.99**                          | 6.54 ± 1.12     | 8.47 ± 2.57                            | 6.21 ± 1.31     | 6.90 ± 1.59                           |
| LW/TL (mg/cm)          | 76.44 ± 10.84**                 | 75.99 ± 14.83*                         | 87.75 ± 9.75    | 97.81 ± 27.34                          | 97.32 ± 16.95   | 100.31 ± 21.03                        |
| Female                 |                                 |                                        |                 |                                        |                 |                                       |
|                        | WT (n=19)                       | <i>Col4a3</i> <sup>-/-</sup> (n=13-14) | WT (n=11-13)    | <i>Col4a3</i> <sup>-/-</sup> (n=10-12) | WT (n=13-14)    | <i>Col4a3</i> <sup>-/-</sup> (n=11)   |
| BW (g)                 | 17.23 ± 1.86**                  | 15.58 ± 1.71**                         | 17.74 ± 2.10+++ | 16.07 ± 0.73+++                        | 21.39 ± 1.81    | 20.94 ± 1.56                          |
| HW (mg)                | 84.75 ± 13.21**                 | 92.81 ± 14.98**,*                      | 103.2 ± 10.77   | 101.8 ± 10.27                          | 116.8 ± 16.57   | 128.1 ± 16.18                         |
| Tibia length (cm)      | 1.72 ± 0.11 <sup>ε</sup>        | 1.64 ± 0.08 <sup>¥</sup>               | 1.63 ± 0.07++++ | 1.62 ± 0.037 <sup>++++</sup>           | 1.78 ± 0.07     | 1.76 ± 0.06                           |
| HW/BW (mg/g)           | 5.0 ± 0.59 <sup>ε</sup>         | 5.89 ± 0.76*                           | 5.82 ± 0.64     | 6.22 ± 0.5                             | 5.38 ± 0.80     | 6.16 ± 1.02                           |
| HW/TL(mg/cm)           | 49.26 ± 6.9 <sup>εεεε,***</sup> | 56.34 ± 7.46***                        | 63.25 ± 5.8     | 62.78 ± 6.25+                          | 64.74 ± 8.35    | 72.81 ± 8.9                           |
| LW (Wet) (mg)          | 119.4 ± 22.08*                  | 101.1 ± 15.83**,*εε                    | 143 ± 37.15     | 151 ± 49.86                            | 167.2 ± 45.28   | 167.4 ± 40.28                         |
| LW/BW (mg/g)           | 6.96 ± 1.22                     | 7.22 ± 1.37                            | 7.97 ± 1.96     | 8.6 ± 1.69                             | 7.89 ± 2.12     | 7.95 ± 1.66                           |
| LW/TL (mg/cm)          | 69.46 ± 12.44*                  | 68.69 ± 11.37 <sup>¥</sup>             | 86.62 ± 20.96   | 84.55 ± 16.26                          | 94.89 ± 23.33   | 95.15 ± 22.51                         |

BW: Body weight, HW: Heart weight, TL: tibia length, LW: lung weight, W: wet, D: dry, mg: miligrams, g: grams, cm: centimeters. Values are mean ± SD. \*p<0.05, \*\*p<0.01, \*\*\*p<0.001 and \*\*\*\*p<0.0001 compared *Col4a3*<sup>-/-</sup> with their respective control (same strain), †p<0.05, ††p<0.01, †††p<0.001, ††††p<0.0001 differences between Balb/C strain and C57Bl/6 strain (WT Vs WT and *Col4a3*<sup>-/-</sup> vs *Col4a3*<sup>-/-</sup>), <sup>ε</sup>p<0.05, <sup>εε</sup>p<0.01, <sup>εεε</sup>p<0.001, <sup>εεεε</sup>p<0.0001 differences between Balb/C strain and 129J (WT vs WT and *Col4a3*<sup>-/-</sup> vs *Col4a3*<sup>-/-</sup>), <sup>¥</sup>p<0.05, <sup>¥¥</sup>p<0.01, <sup>¥¥¥</sup>p<0.001, <sup>¥¥¥¥</sup>p<0.0001 difference between 129J and C57Bl/6 (WT Vs WT and *Col4a3*<sup>-/-</sup> vs *Col4a3*<sup>-/-</sup>).

**Table S4.** Pressure-volume analyses and hemodynamic data of male mice from 129J, Balb/C and C57Bl/6 background by ventricular catheterization

| Echocardiography<br>parameters | 129J            | Balb/C                             |                             | C57Bl/6                            |                                        |                                    |
|--------------------------------|-----------------|------------------------------------|-----------------------------|------------------------------------|----------------------------------------|------------------------------------|
|                                | 8 weeks old     | 8 weeks old                        |                             | 20 weeks old                       |                                        |                                    |
|                                | Pulmonary valve |                                    |                             |                                    |                                        |                                    |
|                                | WT (n=7)        | <i>Col4a3</i> <sup>-/-</sup> (n=6) | WT (n=5)                    | <i>Col4a3</i> <sup>-/-</sup> (n=3) | WT (n=6)                               | <i>Col4a3</i> <sup>-/-</sup> (n=5) |
| ESPVR Slope                    | 2.44 ± 0.7      | 3.6 ± 1.77                         | 1.26 ± 0.36                 | 3.3 ± 1.63*                        | 1.35 ± 0.62                            | 2.48 ± 0.4**                       |
| EDPVR Slope                    | 0.10 ± 0.029    | 0.25 ± 0.16*,*                     | 0.19 ± 0.105                | 0.12 ± 0.065                       | 0.099 ± 0.033                          | 107 ± 0.022                        |
| Stroke Work<br>(mmHg×μL)       | 2150 ± 289.7    | 1462 ± 553.5*                      | 1411±177.6 <sup>ε, ¥¥</sup> | 1679 ± 376.7                       | 2707 ±447                              | 1994 ±252.8*                       |
| Cardiac Output<br>(μL/min)     | 11717±952.2     | 7388 ± 2219 <sup>***,*</sup>       | 11254 ± 1307                | 11137 ± 2658                       | 19833 ± 4255 <sup>¥¥¥, +</sup><br>++++ | 14160 ±2625 <sup>*,*,¥¥¥</sup>     |
| Stroke Volume (μL)             | 25.32 ± 1.96    | 16.42 ± 5.03 <sup>***,*</sup>      | 23.69 ± 2.88                | 26.55 ± 6.1                        | 38.83 ± 8.51 <sup>¥¥¥, +</sup>         | 29.63 ± 4.13 <sup>¥¥</sup>         |
| Volume Maximum<br>(μL)         | 50.15± 8.11     | 48.8 ± 10.52                       | 47.17 ± 8.82                | 49.3 ± 8.68                        | 74.34 ± 18.96 <sup>¥¥, +</sup>         | 65.63 ± 7.48                       |

|                               |                           |                                 |                           |                            |                                  |                                  |
|-------------------------------|---------------------------|---------------------------------|---------------------------|----------------------------|----------------------------------|----------------------------------|
| Volume Minimum (μL)           | 22.64 ± 8.11              | 31.03 ± 9.20                    | 23.47 ± 6.13              | 22.74 ± 3.13               | 35.51 ± 16.96                    | 36 ± 9.16                        |
| End-systolic Volume (μL)      | 25.46 ± 9.4               | 33.91 ± 9.67                    | 29.07 ± 8.47              | 31.21 ± 4.3                | 44.34 ± 15.76 <sup>‡</sup>       | 42.6 ± 11.82                     |
| End-diastolic Volume (μL)     | 48.61 ± 8.80              | 47.16 ± 10.48                   | 46.1 ± 8.10               | 47.35 ± 7.72               | 73.06 ± 19.36 <sup>‡‡, ††</sup>  | 63.7 ± 7.86                      |
| Pressure Maximum (mmHg)       | 93.12 ± 5.92              | 97.17 ± 10.11 <sup>€€</sup>     | 84.17 ± 7.56              | 83.26 ± 6.75               | 93.67 ± 7.64                     | 83.94 ± 10.99                    |
| Pressure minimum (mmHg)       | 2.27 ± 0.88 <sup>€‡</sup> | 2.82 ± 2.23                     | 8.30 ± 4.23               | 10.7 ± 5.68                | 8.32 ± 4.46                      | 4.04 ± 2.56                      |
| Mean Pressure (mmHg)          | 36.47 ± 2.81              | 35.41 ± 7.34                    | 41.2 ± 10.59              | 36.76 ± 6.8                | 43.72 ± 6.92                     | 33.16 ± 8.29 <sup>*</sup>        |
| Pressure Development (mmHg)   | 90.85 ± 6.48              | 94.34 ± 9.25                    | 75.14 ± 3.81 <sup>€</sup> | 69.9 ± 1.07 <sup>€€</sup>  | 85.36 ± 8.23                     | 79.9 ± 9.51 <sup>‡</sup>         |
| End-systolic Pressure (mmHg)  | 85.93 ± 5.82              | 93.03 ± 9.8                     | 83.36 ± 7.47              | 80.57 ± 11.32              | 93.04 ± 7.76                     | 71.45 ± 20.88 <sup>*, ‡, ‡</sup> |
| End-diastolic Pressure (mmHg) | 5.02 ± 0.89 <sup>€‡</sup> | 6.71 ± 2.75                     | 14.32 ± 6.55              | 15.82 ± 7.49               | 12.29 ± 5.14                     | 7.41 ± 3.12                      |
| Heart Rate (bpm)              | 462 ± 11.52               | 450.9 ± 17.83                   | 476.6 ± 37.14             | 422.4 ± 68.37              | 511.7 ± 31.01                    | 476.6 ± 38.13                    |
| Ejection Fraction (%)         | 53.47 ± 9.3               | 34.76 ± 10.25 <sup>**, *</sup>  | 53.89 ± 4.23              | 54.54 ± 4.15               | 56.37 ± 14.14                    | 46.64 ± 8.90                     |
| Ea (mmHg/μL)                  | 3.42 ± 0.28               | 6.15 ± 1.55 <sup>**, ****</sup> | 3.58 ± 0.59               | 3.16 ± 0.95 <sup>€€€</sup> | 2.52 ± 0.71                      | 2.47 ± 0.78 <sup>***</sup>       |
| Power Max (mmHg×μL/s)         | 5654 ± 1973               | 4601 ± 2510                     | 10409 ± 5482              | 6174 ± 2834                | 13567 ± 5462                     | 6137 ± 2988 <sup>*</sup>         |
| dP/dt max (mmHg/s)            | 6416 ± 660                | 7235 ± 727 <sup>*, €€</sup>     | 5068 ± 469.5 <sup>†</sup> | 4812 ± 1390                | 6818 ± 1446                      | 6446 ± 661                       |
| dP/dt min (mmHg/s)            | -7292 ± 970.5             | -6978 ± 1925                    | -4818 ± 1124              | -5342 ± 813.7              | -6643 ± 2519                     | -6935 ± 1343                     |
| dV/dt max (μL/s)              | 605.9 ± 103.9             | 407.7 ± 148.8 <sup>*</sup>      | 606.3 ± 77.31             | 519.5 ± 86.13              | 1042 ± 213.7 <sup>***, †††</sup> | 758.4 ± 167.7 <sup>*, ‡, ‡</sup> |
| dV/dt min (μL/s)              | -800.4 ± 94.54            | -569.5 ± 138.9 <sup>*, *</sup>  | -681.7 ± 115.1            | -784.8 ± 212.3             | -1184 ± 350.4                    | -961.1 ± 290.9                   |
| P@dV/dt max (mmHg)            | 2.85 ± 1.33 <sup>‡€</sup> | 4.00 ± 2.14                     | 9.06 ± 4.87               | 11.31 ± 5.01               | 9.79 ± 5.06                      | 4.68 ± 2.8                       |
| P@dP/dt max (mmHg)            | 47.36 ± 12.6              | 55.98 ± 12.55                   | 38.74 ± 6.12              | 38.09 ± 4.93               | 51.49 ± 11.89                    | 42.06 ± 14.05                    |
| V@dP/dt max (μL)              | 48.56 ± 9.41              | 47.92 ± 10.32                   | 45.4 ± 8.32               | 48.48 ± 8.44               | 71.47 ± 17.34 <sup>‡‡, ††</sup>  | 64.17 ± 6.51                     |
| V@dP/dt min (μL)              | 23.26 ± 8.18              | 31.78 ± 9.19                    | 23.75 ± 6.26              | 22.93 ± 3.21               | 35.83 ± 17.32                    | 36.71 ± 9.04                     |
| Tau (ms)                      | 6.49 ± 0.62               | 7.72 ± 2.15                     | 10.24 ± 2.91              | 11.03 ± 3.91               | 9.03 ± 2.28                      | 6.56 ± 1.41                      |
| dP/dt max (mmHg) occlusion    | 100.8 ± 55.41             | 197 ± 65.87 <sup>*</sup>        | 35.47 ± 20.81             | 56.29 ± 16.45 <sup>€</sup> | 76.68 ± 45.34                    | 99.06 ± 25.67                    |
| PRSW                          | 70.66 ± 15.95             | 67.57 ± 12.53                   | 39.53 ± 17.28             | 54.56 ± 4.95 <sup>€</sup>  | 56.69 ± 17.71                    | 64.33 ± 11.65                    |

ESPVR: End-systolic Pressure-Volume Relationship, EDPVR: End-diastolic Pressure-Volume Relationship; Ea: Arterial Elastance; P: Pressure, t: Time, V: Volume; Max: Maximum; Min: Minimum; Tau: Time Constant of LV Relaxation. Values are mean ± SD. \*p<0.05, \*\*p<0.01, \*\*\*p<0.001 and \*\*\*\*p<0.0001 compared Col4a3-/- with their respective control (same strain), †p<0.05, ††p<0.01, †††p<0.001, ††††p<0.0001 differences between Balb/C strain and C57Bl/6 strain (WT Vs WT and Col4a3-/- vs Col4a3-/-), €p<0.05, €€p<0.01, €€€p<0.001, €€€€p<0.0001 differences between Balb/C strain and 129J (WT vs WT and Col4a3-/- vs Col4a3-/-), ‡p<0.05, ‡‡p<0.01, ‡‡‡p<0.001, ‡‡‡‡p<0.0001 difference between 129J and C57Bl/6 (WT Vs WT and Col4a3-/- vs Col4a3-/-). Two \*p<0.05, \*\*p<0.01, \*\*\*p<0.001 and \*\*\*\*p<0.0001 compared Col4a3-/- with their respective control (same strain) using t-test (parameters with normal distribution) or Mann-Whitney test (for data following non normal distribution).

**Table S5.** Pressure-volume analyses and hemodynamic data of female mice from 129J, Balb/C and C57Bl/6 background by ventricular catheterization

| Echocardiography<br>parameters    | 129J                      |                                    | Balb/C                      |                                    | C57Bl/6                        |                                    |
|-----------------------------------|---------------------------|------------------------------------|-----------------------------|------------------------------------|--------------------------------|------------------------------------|
|                                   | 8 weeks old               |                                    | 8 weeks old                 |                                    | 20 weeks old                   |                                    |
|                                   | Pulmonary valve           |                                    |                             |                                    |                                |                                    |
|                                   | WT (n=8)                  | <i>Col4a3</i> <sup>-/-</sup> (n=9) | WT (n=6)                    | <i>Col4a3</i> <sup>-/-</sup> (n=6) | WT (n=6)                       | <i>Col4a3</i> <sup>-/-</sup> (n=5) |
| ESPVR Slope                       | 2.88 ± 0.78 <sup>‡</sup>  | 3.07 ± 0.79 <sup>€</sup>           | 2.13 ± 0.62                 | 1.7 ± 0.65                         | 1.64 ± 0.53                    | 1.2 ± 1.03                         |
| EDPVR Slope                       | 0.12 ± 0.03               | 0.32 ± 0.20 <sup>*</sup>           | 0.13 ± 0.06                 | 0.39 ± 0.26                        | 0.16 ± 0.03                    | 0.37 ± 0.16 <sup>**</sup>          |
| Stroke Work<br>(mmHg×μL)          | 1831 ± 465.9              | 1431 ± 538.2                       | 1321 ± 412.7 <sup>€,†</sup> | 1037 ± 173.9                       | 2037 ± 241.7                   | 1578 ± 104.8 <sup>**</sup>         |
| Cardiac Output<br>(μL/min)        | 9281 ± 2201 <sup>‡‡</sup> | 7544 ± 2803 <sup>‡</sup>           | 9563 ± 2365 <sup>††</sup>   | 7961 ± 1565                        | 14417 ± 2410                   | 11417 ± 1015 <sup>*</sup>          |
| Stroke Volume (μL)                | 22.25 ± 5.24              | 18.02 ± 5.44                       | 21.2 ± 6.36                 | 18.45 ± 2.49                       | 30.41 ± 4.57 <sup>‡,†</sup>    | 23.63 ± 2.28 <sup>**</sup>         |
| Volume Maximum<br>(μL)            | 39.73 ± 5.76              | 39.86 ± 10.44                      | 40.37 ± 11.79               | 37.66 ± 5.71                       | 50.42 ± 5.79                   | 52.81 ± 11.57                      |
| Volume Minimum<br>(μL)            | 15.99 ± 5.39              | 20.73 ± 7.86                       | 19.16 ± 6.92                | 19.2 ± 5.8                         | 20 ± 2.15                      | 29.18 ± 11.5                       |
| End-systolic Volume<br>(μL)       | 17.89 ± 5.91              | 22.7 ± 7.94                        | 23.08 ± 7.17                | 23.54 ± 6.76                       | 24.73 ± 2.11                   | 31.38 ± 11.35                      |
| End-diastolic<br>Volume (μL)      | 37.4 ± 5.48               | 38.81 ± 9.94                       | 39.44 ± 11.3                | 36.57 ± 5.41                       | 49.45 ± 5.68                   | 52.11 ± 11.84                      |
| Pressure Maximum<br>(mmHg)        | 89.79 ± 5.11              | 89.43 ± 11.88 <sup>€€</sup>        | 79.94 ± 1.65                | 72.67 ± 8.37                       | 91.6 ± 7.1                     | 86.16 ± 4.0                        |
| Pressure minimum<br>(mmHg)        | 1.99 ± 1.56 <sup>‡</sup>  | 3.48 ± 2.75                        | 6.03 ± 1.8                  | 6.4 ± 2.04                         | 8.59 ± 6.3                     | 6.83 ± 4.4                         |
| Mean Pressure<br>(mmHg)           | 32.8 ± 2.3                | 36.01 ± 10.27                      | 35.95 ± 4.73                | 34 ± 8.9                           | 45.23 ± 11.36                  | 39.51 ± 6.43                       |
| Pressure<br>Development<br>(mmHg) | 87.8 ± 6.12 <sup>€</sup>  | 85.95 ± 10.77 <sup>€€</sup>        | 74.74 ± 4.1                 | 66.26 ± 6.39 <sup>*</sup>          | 81.01 ± 2.14                   | 79.34 ± 7.19                       |
| End-systolic<br>Pressure (mmHg)   | 83.64 ± 5.9               | 84.06 ± 14.6                       | 77.41 ± 3.8                 | 68 ± 8.3 <sup>*,€</sup>            | 91.14 ± 7.42                   | 78.76 ± 6.91 <sup>*</sup>          |
| End-diastolic<br>Pressure (mmHg)  | 4.24 ± 1.35 <sup>€</sup>  | 10.34 ± 4.62 <sup>*</sup>          | 9.79 ± 3.45                 | 14.57 ± 9.55                       | 16.38 ± 10.54                  | 11.98 ± 5.22                       |
| Heart Rate (bpm)                  | 418.9 ± 38.73             | 415 ± 73.26                        | 457.6 ± 37.37               | 429.1 ± 33.93                      | 473.3 ± 28.63                  | 482.4 ± 19.06                      |
| Ejection Fraction (%)             | 57.81 ± 11.98             | 47.06 ± 12.13                      | 54.29 ± 9.36                | 50.93 ± 9.51                       | 63.41 ± 4.52                   | 48.48 ± 13.85 <sup>*</sup>         |
| Ea (mmHg/μL)                      | 3.99 ± 1.13               | 5.05 ± 1.64                        | 3.99 ± 1.41                 | 3.71 ± 0.46                        | 3.033 ± 0.28                   | 3.35 ± 0.31                        |
| Power Max<br>(mmHg×μL/s)          | 3539 ± 2866               | 5105 ± 4524                        | 5476 ± 3080                 | 5226 ± 3351                        | 13117 ± 10621                  | 8139 ± 2300                        |
| dP/dt max<br>(mmHg/s)             | 6377 ± 543.4              | 5875 ± 15.07                       | 5426 ± 904.1                | 3989 ± 489.6 <sup>*</sup>          | 6402 ± 1100                    | 6610 ± 1416 <sup>‡,††</sup>        |
| dP/dt min (mmHg/s)                | -7453 ± 1205              | -6159 ± 1905                       | -5414 ± 1348                | -4722 ± 511.3                      | -5931 ± 1582                   | -6402 ± 1531                       |
| dV/dt max (μL/s)                  | 448.2 ± 157.1             | 461.6 ± 136.8                      | 486 ± 110                   | 459.8 ± 109.7                      | 827.4 ± 262.3 <sup>‡‡,††</sup> | 639.9 ± 106.6                      |
| dV/dt min (μL/s)                  | -688 ± 179.9              | -567.3 ± 193                       | -577.9 ± 219.6              | -505.2 ± 127.1                     | -783.9 ± 95.49                 | -695.7 ± 66.62                     |

|                               |               |                           |                           |                           |                          |                                |
|-------------------------------|---------------|---------------------------|---------------------------|---------------------------|--------------------------|--------------------------------|
| P@dV/dt max<br>(mmHg)         | 2.97 ± 1.49   | 4.60 ± 2.42               | 6.26 ± 1.79               | 6.6 ± 2.05                | 9.05 ± 6.16 <sup>¥</sup> | 7.20 ± 4.45                    |
| P@dP/dt max<br>(mmHg)         | 49.62 ± 4.78  | 49 ± 10.59                | 36.98 ± 5.33 <sup>€</sup> | 33.82 ± 7.63 <sup>€</sup> | 51.34 ± 5.20             | 42.87 ± 5.11 <sup>*</sup>      |
| V@dP/dt max (µL)              | 38.55 ± 5.72  | 39.06 ± 10.03             | 39.28 ± 11.38             | 36.98 ± 6.29              | 47.89 ± 5.21             | 51.44 ± 11.91                  |
| V@dP/dt min (µL)              | 16.34 ± 5.57  | 21.24 ± 7.76              | 19.58 ± 6.75              | 19.38 ± 6 <sup>†</sup>    | 20.42 ± 2.23             | 33.07 ± 7.39 <sup>***,*¥</sup> |
| Tau (ms)                      | 6.74 ± 0.73   | 9.33 ± 2.31 <sup>**</sup> | 9.77 ± 3.82               | 8.98 ± 1.23               | 9.35 ± 3.23              | 8.3 ± 2.8                      |
| dP/dt max (mmHg)<br>occlusion | 88.51 ± 45.03 | 112.6 ± 54.09             | 95.3 ± 54.63              | 55.01 ± 15.82             | 90.83 ± 38.41            | 93.62 ± 28.92                  |
| PRSW                          | 60.86 ± 10.03 | 57.08 ± 11.15             | 47.93 ± 6.81              | 38.06 ± 11.33             | 42.42 ± 16.18            | 42.54 ± 22.4                   |

ESPVR: End-systolic Pressure-Volume Relationship, EDPVR: End-diastolic Pressure-Volume Relationship; Ea: Arterial Elastance; P: Pressure, t: Time, V: Volume; Max: Maximum; Min: Minimum; Tau: Time Constant of LV Relaxation. Values are mean ± SD. \*p<0.05, \*\*p<0.01, \*\*\*p<0.001 and \*\*\*\*p<0.0001 compared Col4a3<sup>-/-</sup> with their respective control (same strain), †p<0.05, ††p<0.01, †††p<0.001, ††††p<0.0001 differences between Balb/C strain and C57Bl/6 strain (WT vs WT and Col4a3<sup>-/-</sup> vs Col4a3<sup>-/-</sup>), €p<0.05, €€p<0.01, €€€p<0.001, €€€€p<0.0001 differences between Balb/C strain and 129J (WT vs WT and Col4a3<sup>-/-</sup> vs Col4a3<sup>-/-</sup>), ¥P<0.05, ¥¥p<0.01, ¥¥¥p<0.001, ¥¥¥¥p<0.0001 difference between 129J and C57Bl/6 (WT Vs WT and Col4a3<sup>-/-</sup> vs Col4a3<sup>-/-</sup>). Two \*p<0.05, \*\*p<0.01, \*\*\*p<0.001 and \*\*\*\*p<0.0001 compared Col4a3<sup>-/-</sup> with their respective control (same strain) using t-test (parameters with normal distribution) or Mann-Whitney test (for data following non normal distribution).
